# Supplementary material
Source: publisher figshare collection journal article supplement (https://frontiersin.figshare.com/ndownloader/files/28671441)
Supplement: Supplementary file [file 28671441]

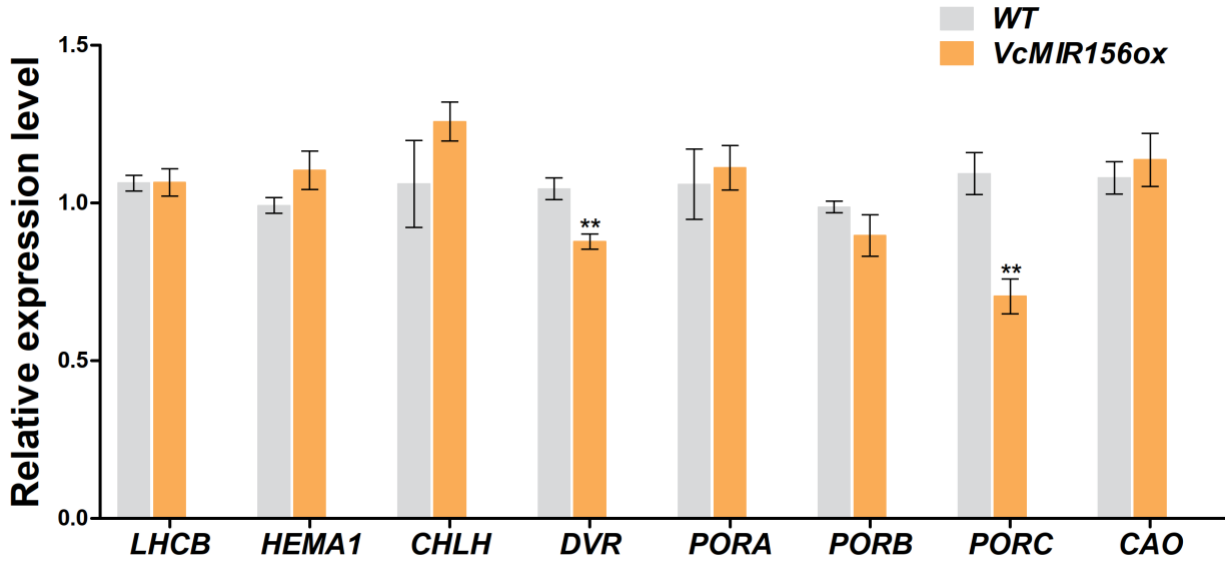

**Supplementary Figure 5** Expression patterns of 8 chlorophyll-associated genes (*AtLHCB*, *AtHEMA1*, *AtCHLH*, *AtDVR*, *AtPORA*, *AtPORB*, *AtPORC*, *AtCAO*) in wild type and transgenic lines overexpressing *VcMIR156a*. Total RNAs were extracted from 7-day-old transgenic seedlings and wild type. Values were normalized against the gene *AtACTIN8*. Error bars indicate standard errors of three biological and technical replicates, and significant differences are denoted by asterisks: \* $P < 0.05$ , \*\* $P < 0.01$ .
